# Supplementary material for: The Bacteriophage Lambda CII Phenotypes for Complementation, Cellular Toxicity and Replication Inhibition Are Suppressed in cII-oop Constructs Expressing the Small RNA OOP
Source: PubMed Central journal article supplement (PMC5869508; doi:10.3390/v10030115), 2018-03-07
Supplement: viruses-10-00115-s001.pdf [file viruses-10-00115-s001.pdf]

1 **Figure S1.** Sequence variations (1-3) of pClpR-cII-timm enabling *cII* expression arrangements. The point  
2 mutations incorporated within *cII* or promoter *pO* were described in [1-4]. The sequences in *magenta*  
3 are RBS. For the plasmids in sequences 1 & 2 the RBS is identical to 8 bases of the RBS consensus  
4 sequence for gene *cro*. Sequences in *red* are “-10” promoter regions (for *pO*, in plasmid sequence 2; for  
5 *pE*, in plasmid sequence 3). The sequences in *blue* (underlined) are for “-35” region of *pO* promoter  
6 (sequence 2) and the suggested -35 region for the *pE* promoter (in sequence 3) within the N-terminal  
7 sequence of *cII*. The sequence in *green* (shown sequence 2) represents the *oop* sequence encoding OOP  
8 RNA. The Plasmids 1 include: cII, cII<sub>1-92</sub> (deleting five amino acids from the carboxy-terminal end of *cII*),  
9 cII<sub>1-87</sub>, cII<sub>1-77</sub>, cII<sub>1-67</sub>, cII<sub>1-57</sub>, cII<sub>1-47</sub>, cII-3638, cII-3639, cII-3638+3639. The sequence for Plasmids 2 include  
10 the sequence 1 for WT *cII* plus the *oop* sequence that overlaps the carboxyl end of *cII*, plus the *pO*  
11 sequence that overlaps with the sequence of N-terminal end of gene *O*: cII-oop-pO94, cII-oop-pO45, cII-  
12 oop-pO45-38383LK, cII-oop-pO-38683-87MH. The sequence for Plasmids 3 include the WT *pE* promoter  
13 from sR-38339-pE-cII, sR-38339pE-cII-oop-pO94 and *pE* mutations cII-cy3048, cII-cy2001, cII-cy42, and cII-  
14 cy3001.

15

1  
2  
3  
4  
5  
6  
7  
8  
9  
10  
11  
12  
13  
14  
15  
16  
17  
18  
19  
20  
21  
22  
23  
24  
25  
26  
27  
28  
29  
30  
31

| Plasmid in host cells                             | $\lambda imm434cII2002$ pfu spotted per overlay plate incubated at |      |     |         |      |     |         |      |     |
|---------------------------------------------------|--------------------------------------------------------------------|------|-----|---------|------|-----|---------|------|-----|
|                                                   | 30°C                                                               |      |     | 37°C    |      |     | 39°C    |      |     |
|                                                   | ~16,000                                                            | ~160 | ~16 | ~16,000 | ~160 | ~16 | ~16,000 | ~160 | ~16 |
| 594 [ <i>cII</i> ]                                |                                                                    |      |     |         |      |     |         |      |     |
| 594 [ <i>cII</i> <sub>1-92</sub> ]                |                                                                    |      |     |         |      |     |         |      |     |
| 594 [ <i>cII</i> <sub>1-87</sub> ]                |                                                                    |      |     |         |      |     |         |      |     |
| 594 [ <i>cII</i> <sub>1-77</sub> ]                |                                                                    |      |     |         |      |     |         |      |     |
| 594 <i>hflA::kan</i> [ <i>cII</i> ]               |                                                                    |      |     |         |      |     |         |      |     |
| 594 <i>pcnB::kan</i> [ <i>cII</i> ]               |                                                                    |      |     |         |      |     |         |      |     |
| 594 <i>rpoB</i> B8 [ <i>cII</i> ]                 |                                                                    |      |     |         |      |     |         |      |     |
| 594 <i>rpoB</i> D2 [ <i>cII</i> ]                 |                                                                    |      |     |         |      |     |         |      |     |
| 594 <i>rpoB</i> D2 [ <i>cII</i> <sub>1-87</sub> ] |                                                                    |      |     |         |      |     |         |      |     |

**Figure S2.** Deletions in *cII*, or host mutations influencing CII complementation *in trans*. Complementation of the *cII*-defect on the phage by the *cII* allele expressed from the plasmid was assessed by the ability of the spotted phage to form clear, turbid, or no pfu at 37 and 39°C. High expression of the  $Cl_{434}$  repressor made from the phage will fully repress its *oL* (not assayed) and *oR* transcription, preventing phage growth (pfu formation). An intermediate level of *cII* expression from the plasmid at 37°C can permit the otherwise clear plaque forming  $\lambda imm434 cII68$  and  $\lambda imm434 cII2002$  phages (seen at 30°C) to form turbid plaques at 37°C. In contrast, the expression of the *cII* allele on the plasmid is blocked when the Ts  $Cl_{857}$  repressor is active in cells grown at 30°C.

1

| Plasmid in host cells                         | <i>λimm434cII2002</i> pfu spotted per overlay plate incubated at |      |     |         |      |     |         |      |     |
|-----------------------------------------------|------------------------------------------------------------------|------|-----|---------|------|-----|---------|------|-----|
|                                               | 30°C                                                             |      |     | 37°C    |      |     | 39°C    |      |     |
|                                               | ~16,000                                                          | ~160 | ~16 | ~16,000 | ~160 | ~16 | ~16,000 | ~160 | ~16 |
| 594 [cII- <i>oop</i> -pO94] (p680)            |                                                                  |      |     |         |      |     |         |      |     |
| 594 [cII- <i>oop</i> -pO94-38684-88MH] (p681) |                                                                  |      |     |         |      |     |         |      |     |
| 594 [sR38339-pE-cII] (p747)                   |                                                                  |      |     |         |      |     |         |      |     |
| 594 [sR38339-pE-cII- <i>oop</i> -pO94] (p748) |                                                                  |      |     |         |      |     |         |      |     |
| 594 [cII- <i>oop</i> -pO45WT] (p763)          |                                                                  |      |     |         |      |     |         |      |     |
| 594 [cII- <i>oop</i> -pO45-38684-88MH] (p759) |                                                                  |      |     |         |      |     |         |      |     |
| 594 [cII- <i>oop</i> -pO45-38683LK] (p762)    |                                                                  |      |     |         |      |     |         |      |     |

2

3

**Figure S3.** Influence of *pO* variations on CII complementation *in trans*.

4

5

6

7

8

9

10

11

12

13

14

15

1 **Supplemental tables**

2 **Table S1.** Gene expression units cloned within plasmid vector pcIpR-[ ]-timm.

| 3  | Plasmid                  | Strain | Construction primer/ method employed               |
|----|--------------------------|--------|----------------------------------------------------|
| 4  | cII                      | p679   | L-Bam-cII and R-ClaBsi-cII copy from p27R          |
| 5  | cII-oop-pO94             | p680   | L-Bam-cII and R-Bsi-O-Po copy from p27R            |
| 6  | cII-oop-pO94-38683-87MH  | p681   | L-Bam-cII and R-Bsi-O-Po copy from p27RpO          |
| 7  | cII <sub>1-92</sub>      | p696   | L-Bam-cII and R-Cla-Bsi-CIIΔ15                     |
| 8  | cII <sub>1-87</sub>      | p732   | L-Bam-cII and R-Cla-Bsi-CIIΔ30                     |
| 9  | cII <sub>1-77</sub>      | p715   | L-Bam-cII and R-Cla-Bsi-CIIΔ60                     |
| 10 | cII <sub>1-67</sub>      | p721   | L-Bam-cII and R-Cla-Bsi-CIIΔ90                     |
| 11 | cII <sub>1-57</sub>      | p723   | L-Bam-cII and R-Cla-Bsi-CIIΔ120                    |
| 12 | cII <sub>1-47</sub>      | p724   | L-Bam-cII and R-Cla-Bsi-CIIΔ150                    |
| 13 | cII-oop-pO45WT           | p763   | L-Bam-cII and R-Bsi45poWT                          |
| 14 | cII-oop-pO45-38383LK     | p762   | L-Bam-cII and R-Bsi45po38383LK                     |
| 15 | cII-oop-pO45-38683-87MH  | p759   | L-Bam-cII and R-Bsi45po38684-88MH                  |
| 16 | cII-3638                 | p756   | L-Bam-cII and R-Bsi-cII-3638                       |
| 17 | cII-3639                 | p757   | L-Bam-cII and R-Bsi-cII-3639                       |
| 18 | cII-3638+3639            | p758   | L-Bam-cII and R-Bsi-3638+3639                      |
| 19 | sR-38339-cII-cy3048      | p756   | LXbaI-38339-cy3048 and R-ClaBsi-cII                |
| 20 | sR-38339-cII-cy2001      | p765   | LXbaI-38339-cy2001 and R-ClaBsi-cII                |
| 21 | sR-38339-cII-cy42        | p764   | LXbaI-38339-cy42 and R-ClaBsi-cII                  |
| 22 | sR-38339-cII-cy3001      | p766   | LXbaI-38339-cy3001 and R-ClaBsi-cII                |
| 23 | sR-38339-pE-CII          | p747   | LBamXba38339 and R-nopo-Bsi-Cla (with WT cII stop) |
| 24 | sR-38339-pE-cII-oop-pO94 | p748   | LBamXba38339 and R-Bsi-O-po (with WT cII stop)     |

26 **Table S2.** Oligonucleotides used for plasmid construction and sequencing.

| Primer Name          | 5' to 3' Sequence                                           |
|----------------------|-------------------------------------------------------------|
| L37904+18            | gctgctctgtgtaaatgg                                          |
| R-153-19             | gaagacagtcataagtgcgg                                        |
| L-Bam-CII            | atatggatccatggttctgtgcaaacacgcaacgaggctctacg                |
| R-ClaBsi-CII         | atatatcgatcgtagcttagaactccatctggattgttcagaacgctcgg          |
| R-Bsi-45poWT         | atat cgtacgttactgccgaagttgagtattttgctgtattgtcataatgactcctgt |
| R-Bsi-45po38383LK    | atatcgtacgttactgccgaagttgagtattttgctgtattgtcataaAgactcctgt  |
| R-Bsi-45po38684-88MH | atatcgtacgttactgccgaagttgagtattttgctgtattgtcGCGGgactcctgt   |
| R-Cla-Bsi-CII        | atatatcgatcgtagcttagaactccatctggattgttcagaacgctcgg          |
| R-Cla-Bsi-CIIΔ15     | atatatcgatcgtagcttattgttcagaacgctcgggtgccgggctttttt         |
| R-Cla-Bsi-CIIΔ30     | atatatcgatcgtagcttaggttgcggcgggcttttttattggtgagaatcgc       |
| R-Cla-Bsi-CIIΔ60     | atatatcgatcgtagcttaaatcgcaactgtcgcgccaatcgagccatgtc         |
| R-Cla-Bsi-CIIΔ90     | atatatcgatcgtagcttacatgtc gtcgtcaacgacccccattcaagaacagc     |
| R-Cla-Bsi-CIIΔ120    | atatatcgatcgtagcttaaacagcaagcagcattgagaacttggatccagtc       |
| R-Cla-Bsi-CIIΔ150    | atatatcgatcgtagcttaccagtcctctccactgctgatctgcgacttatc        |

|                    |                                                                       |
|--------------------|-----------------------------------------------------------------------|
| L-BamXba38339new   | atatggatcctctatctagatatctaaggaaataacttacataggttcgtgc                  |
| R-noPo-Bsi-Clal    | atatatcgatcgtagctcagaactccatctggattgttcagaacgctcgg                    |
| R-Bsi-O-Po         | atatcgtacgtaacatcatcgagatctgccacattacgctcctgtccggc                    |
| R-Bsi-CII-3638     | atatcgtacgtagaactccaCctggattgttcagaacgctcgg                           |
| R-Bsi-CII-3639     | atatcgtacgtagaactccat ctggattCgttcagaacgctcgg                         |
| R-Bsi-3638+3639    | atatcgtacgtagaactccaCctggattCgttcagaacgctcgg                          |
| LXbal-38339-cy3048 | atattctagatatcttaggaaGtacttacataggttcg                                |
| LXbal-38339-cy2001 | atattctagatatcttaggaaatacGtacctacataggttcgtgc                         |
| LXbal-38339-cy42   | atattctagatatcttaggaaataacttacataggttcgtgcTaacaaacgcaacgaggc          |
| LXbal-38339-cy3001 | atattctagatatcttaggaaataacttacataggttcgtgcaacaaacgTaacgaggctctacgaatc |
| L-Bam-OOP#1        | atatggatcctggctcgattggcgcgacaagt                                      |
| L-Bam-OOP#2        | atatggatccgttgacgacgacatggctcgat                                      |
| R-Cal-O            | atatatcgattatagatccaccccgtaaattccagtc                                 |
| R-Clal-36P         | atatatcgattacctgctgtacctgctggcttttcgtcg                               |
| R-Clal-63P         | atatatcgattacttctgtctggtcacggtagcc                                    |

1

2 **References**

3 1. Daniels, D. L., Schroeder, J.L., Szybalski, W., Sanger, F., and Blattner, F.R, Appendix I. A molecular map of  
4 coliphage lambda. In *Lambda II*, R.W. Hendrix, J. W. R., F.S. Stahl, R.A. Weisberg, Ed. Cold Spring Harbor  
5 Laboratory: Cold Spring Harbor, New York, 1983; pp 469-517.  
6 2. Hayes, S.; Horbay, M. A.; Hayes, C., A CI-Independent Form of Replicative Inhibition: Turn Off of Early  
7 Replication of Bacteriophage Lambda. *PLoS One* **2012**, 7, (5), e36498.  
8 3. Krinke, L.; Mahoney, M.; Wulff, D. L., The role of the OOP antisense RNA in coliphage lambda  
9 development. *Mol Microbiol* **1991**, 5, (5), 1265-72.  
10 4. Wulff, D. L., Rosenberg, M.R., Establishment of repressor synthesis. In *Lambda II*, Hendrix, R. W.,  
11 Roberts, J.W., Stahl, F.W., and Weisberg, R.A., Ed. Cold Spring Harbor Laboratory Press: Cold Spring  
12 Harbor, NY, 1983; pp 519-684.

13
